# Supplementary material for: Comparative genomics and prediction of conditionally dispensable sequences in legume–infecting Fusarium oxysporum formae speciales facilitates identification of candidate effectors
Source: PubMed Central journal article supplement (PMC4779268; doi:10.1186/s12864-016-2486-8), 2016-03-05
Supplement: 12864_2016_2486_MOESM11_ESM.pdf [file 12864_2016_2486_MOESM11_ESM.pdf]

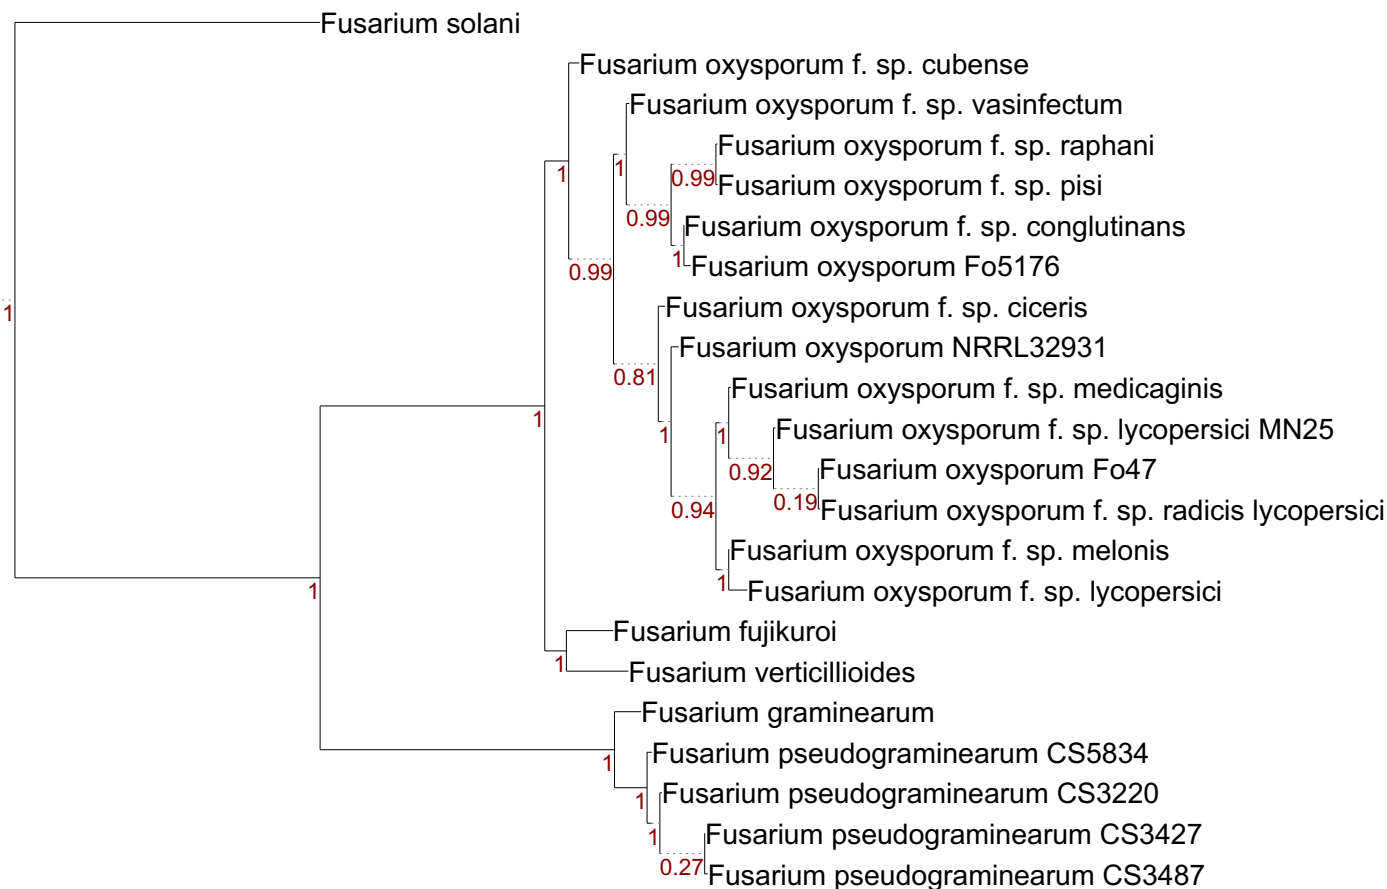

0.03
